1 **Title: Mitigating antimicrobial resistance with aspirin (acetylsalicylic acid) and**  
2 **paracetamol (acetaminophen): Conversion of doxycycline and minocycline resistant**  
3 **bacteria into sensitive in presence of aspirin and paracetamol**

4

5 **Running Title: Aspirin synergy with doxycycline and minocycline**

6

7 **Bhoj Raj Singh**

8 Division of Epidemiology, ICAR-Indian Veterinary Research Institute, Izatnagar-243 122, India

9 **Corresponding address:** Dr. Bhoj R singh, Principal Scientist and Head, Division of  
10 Epidemiology, ICAR-Indian Veterinary Research Institute, Izatnagar-243 122, India

11 Email: brs1762@gmail.com

12

13

14

15

16

17

18

19

20

21

22

23

24 **Abstract**

25 The emergence of antimicrobial resistance (AMR) stimulated research for alternatives  
26 antimicrobials, repurposing of other drugs, antibiotic adjuvants and alternative therapies for  
27 infections. Antimicrobial activity of NSAIDs is often reported and this study evaluated the  
28 antimicrobial potential of the two most common NSAIDs, aspirin (acetylsalicylic acid) and  
29 paracetamol (acetaminophen), against 293 clinical strains of bacteria. The ability of aspirin and  
30 paracetamol to convert minocycline and doxycyclin-resistant bacteria into sensitivity was also  
31 tested using micro-broth dilution assays used for determining minimum inhibitory concentration  
32 (MIC). Aspirin inhibited all 293 bacterial strains at  $\leq 10.24$  mg/ mL concentration. Except for one  
33 strain each of *Serratia grimaceae* and *S. aureus* paracetamol inhibited none of the 293 strains at  
34  $10.24$  mg/ mL. Of the 293 strains 116 (39.59%) were sensitive (MIC  $\leq 4$   $\mu$ g/mL) to doxycycline  
35 and 127 (43.34%) to minocycline. Of the selected 57 minocycline-resistant (MIC  $>4$   $\mu$ g/mL)  
36 strains aspirin converted 32 (56.14%) to minocycline-sensitive. Of the 49 doxycycline-resistant  
37 (MIC  $>4$   $\mu$ g/mL) strains tested in presence of aspirin 30 (61.22%) turned sensitive. Of the 34  
38 doxycycline-resistant strains tested in presence of paracetamol 11 (32.35%) become sensitive.  
39 The study concluded that most of the bacterial strains were not susceptible to aspirin and  
40 paracetamol at their concentrations often available in plasma at maximum therapeutic dose levels  
41 and had no significant change in their susceptibility to doxycycline and minocycline. The study  
42 indicated the potential of aspirin and its combination with antibiotics in the development of  
43 therapeutically useful topical antimicrobial formulations.

44 **Keywords:** Antimicrobial resistance (AMR), Repurposing, NSAIDs, Synergy, Antibiotics,  
45 Topical

46

## 47 **Introduction**

48           The global emergence of antimicrobial drug resistance (AMR) even against drugs of the  
49 latest classes and generations of antibiotics is a mind-boggling problem for microbiologists and  
50 clinicians. Several alternative therapies have been suggested and tried for mitigating the problem  
51 of AMR. Scientists have also thought of “Drug repurposing” which is the use of the pre-existing  
52 approved drugs for their antimicrobial or antibiotic adjuvant properties (1). The synergism  
53 between antibiotics and the repurposed drugs can minimize the therapeutic dose of antibiotics  
54 and also the time and costs of the invention of a new drug and putting it for therapeutic use after  
55 required approval (2). In the past numerous molecules of non-antibiotic nature earlier  
56 acknowledged as anthelmintics, anticancer drugs, antipsychotics, antidepressant drugs,  
57 antiplatelets and NSAIDs have been evaluated for their antimicrobial potential (3, 4). Some of  
58 the cyclooxygenase inhibitory anti-inflammatory and antipyretic drugs (5) such as  
59 acetaminophen (paracetamol), acetylsalicylic acid (aspirin), diclofenac and ibuprofen,  
60 flurbiprofen and similar non-steroidal anti-inflammatory drugs (NSAIDs) almost consistently  
61 used along with antimicrobial therapy have also been explored for their antimicrobial potential.  
62 The most commonly used on-counter NSAIDs (aspirin and paracetamol) are known less for their  
63 antibacterial activity in acceptable therapeutic dosages but are reported to enhance the  
64 performance of antibiotics either through their synergistic antibacterial action with antibiotics (6-  
65 9) or through reducing adherence, production of biofilm, and other virulence factors, and altering  
66 antibiotic susceptibility of pathogens (4, 5).

67           For treatment of *Coronavirus* disease-2019 (COVID-19) two NSAIDs, aspirin (10) and  
68 paracetamol (11) along with one or more antibiotics, mainly doxycycline (12) and minocycline  
69 (13, 14) are commonly recommended as an adjunct in a COVID-19 treatment regimen. The

70 present study was conducted to evaluate the *in vitro* effect of aspirin on antibacterial activity of  
71 doxycycline and minocycline, and of paracetamol on antibacterial activity of doxycycline against  
72 selected common potentially pathogenic bacterial strains to understand their interaction.

### 73 **Materials and Methods**

74 ***Bacterial isolates used in the study:*** Total 293 bacterial strains of 32 different genera isolated  
75 earlier from clinical samples (Tab. 1) and available as glycerol stocks at Clinical Epidemiology  
76 Laboratory of Division of Epidemiology, ICAR-Indian Veterinary Research Institutes, Izatnagar  
77 were revived and checked for purity and identity (15) were sub-cultured on to nutrient agar  
78 (BBL, Difco) slants till tested.

79 ***Determination of minimum inhibitory concentration (MIC) of NSAIDs and antibiotics:*** The  
80 MIC was determined using the micro-broth dilution method in 96 well plates following the CLSI  
81 (16, 17) guidelines.

#### 82 *Stock Solutions:*

- 83 1. Aspirin (acetylsalicylic acid, Sigma Aldrich, USA) was dissolved in ethanol at a  
84 concentration of 40.96 mg/ mL (4×) and stored at 4-8°C as stock solution till tested.
- 85 2. Paracetamol (acetaminophen, Sigma) was dissolved in dimethylsulfoxide (DMSO, Sigma) at  
86 a concentration of 20.48 mg/ mL (2×) and stored at 4-8°C as stock solution till tested.
- 87 3. Doxycycline hydrochloride hemiethanolate hemihydrates (Sigma) was dissolve in sterile  
88 distilled water to have 10.24 mg doxycycline / mL of solution (20×), filter sterilized using 0.2  
89 micron syringe filter and stored at 4-8°C as stock solution till tested.
- 90 4. Minocycline (Sigma) was dissolved in sterile distilled water to have 20.48 mg doxycycline /  
91 mL (20×), filter sterilized using 0.2 micron syringe filter and stored at 4-8°C as stock solution  
92 till tested.

93 Throughout the study for broth culture of bacteria and for determining MIC Mueller Hinton  
94 broth (MHB) medium (BBL Difco) was used. For determining MIC, the test strain of bacteria  
95 was grown in MHB at 37°C to the required period (6-8 h) to obtain culture density of about 0.5  
96 OD<sub>590</sub>. Cultures were kept on ice till used for MIC testing within 24 h. For determining MIC  
97 two-fold serial dilutions of the test compounds (aspirin and paracetamol starting from 10.24  
98 mg/mL; doxycycline starting from 512 µg/ mL, minocycline starting from 1024 µg/ mL) were  
99 made in MHB in 150µL in each of the 96 wells of sterile culture plates (Tarson India Ltd.). In 96  
100 well plates having suitably diluted compound to be tested 1.5 µL of test culture was dispensed  
101 aseptically in three rows of the test plate. Then 2<sup>nd</sup> culture was dispensed in the next three rows  
102 keeping one empty row as control (to check any contamination in testing). In each plate, for each  
103 culture, one column was kept without any antimicrobial compound as positive (for bacterial  
104 growth) control. The lid was applied on the plates and plates were incubated at 37°C for 24 h and  
105 then growth (opacity) was read using a plate reader at 590nm. The last dilution with no readable  
106 growth was recorded as the MIC of the test compound.

107 ***Determination of the effect of aspirin/ paracetamol on antimicrobial activity of doxycycline/***  
108 ***minocycline:*** The MIC of doxycycline/ minocycline in presence of aspirin/ paracetamol was  
109 determined for selected bacterial strains using the similar microdilution method described above  
110 for individual drug MIC. The difference was that instead of using plain MHB for making  
111 antibiotic's dilution aspirin/ paracetamol dilutions were made vertically (columns) starting from  
112 1.28 mg/mL to 0.01 mg/mL and then serial two-fold antibiotic's dilutions were made in rows  
113 (horizontally) starting from 512 µg/ mL. Plates were culture inoculated as above for MIC and  
114 growth of bacteria was determined to record the no-growth wells for each row. The effect of  
115 aspirin was determined both on the MIC of minocycline (for 165 strains, Tab. 2) and

116 doxycycline (for 149 strains, Tab. 3) while the effect of paracetamol on MIC was determined on  
117 doxycycline only for 113 strains of bacteria (Tab. 4).

## 118 **Results**

119 A total of 293 strains of bacteria belonging to 32 genera (Tab. 1) were tested for MIC of  
120 aspirin, paracetamol, doxycycline and minocycline.

121 **MIC of aspirin:** The MIC of aspirin was minimum (0.04 mg/ mL) for one strain each of  
122 *Staphylococcus xylosus* and *Streptococcus pyogenese* while it was maximum (10.24 mg/mL) for  
123 a few strains of *Burkholderia cepacia* (1/1), *Klebsiella pneumoniae* ssp. *pneumoniae* (1/12),  
124 *Pseudomonas aeruginosa* (3/6), *Staphylococcus aureus* (2/9), *S. capitis* ssp. *capitis* (1/3), *S.*  
125 *epidermidis* (6/10), *S. haemolyticus* (1/7) and *S. hominis* (2/5). Rest of strains tested had MIC of  
126 aspirin in between the two limits. The study indicated that about 1% solution of aspirin can stop  
127 the growth of bacteria.

128 **MIC of paracetamol:** Except for one strain each of *Serratia grimaceae* (5.12 mg/mL) and *S.*  
129 *aureus* (5.12 mg/ mL) all the isolates grew in presence of 10.24 mg/ mL paracetamol, the  
130 maximum concentration used for testing.

131 **MIC of doxycycline:** A *Pasteurella canis* strain was the most sensitive to doxycycline (MIC  
132 0.125 µg/mL) while for another strain of *P. canis* MIC was 4 µg/mL. Of 293 strains tested for  
133 46, 16, 25, 26, 24, 20, 20, 27, 12, 56, 7 and 13 strains had doxycycline MIC was 512 µg/mL, 256  
134 µg/mL, 128 µg/mL, 64 µg/mL, 32 µg/mL, 16 µg/mL, 8 µg/mL, 4 µg/mL, 2 µg/mL, 1 µg/mL, 0.5  
135 µg/mL and 0.25 µg/mL, respectively. A total of 116 (39.59%) strains were classified as sensitive  
136 (MIC ≤4 µg/mL) and 177 as resistant (MIC >4 µg/mL) to doxycycline.

137 **MIC of minocycline:** Of 293 strains 8 strains had minocycline MIC equal to 0.125 µg/mL while  
138 37, 8, 31, 14, 29, 23, 27, 25, 21, 24, 11, 34 and 1 strains had MIC equivalent to 0.25 µg/mL, 0.5

139  $\mu\text{g/mL}$ , 1.0  $\mu\text{g/mL}$ , 2.0  $\mu\text{g/mL}$ , 4  $\mu\text{g/mL}$ , 8  $\mu\text{g/mL}$ , 16  $\mu\text{g/mL}$ , 32  $\mu\text{g/mL}$ , 64  $\mu\text{g/mL}$ , 128  $\mu\text{g/mL}$ ,  
140 256  $\mu\text{g/mL}$ , 512  $\mu\text{g/mL}$  and 1024  $\mu\text{g/mL}$ , respectively. The most resistant strain was of *Hafnia*  
141 *alvei* with doxycycline MIC 512 $\mu\text{g/mL}$ . A total of 127 (43.34%) strain with MIC of minocycline  
142  $\leq 4 \mu\text{g/mL}$  were classified as sensitive and 166 as resistant (MIC  $>4 \mu\text{g/mL}$ ) to minocycline.

143 The distribution of 293 strains of bacteria according to the MICs of doxycycline and  
144 minocycline was not normal and an erratic distribution curve was observed. The MICs of  
145 doxycycline and minocycline had a good positive correlation (r, 0.51; p 0.00001). There was no  
146 significant correlation was evident between MICs of doxycycline and aspirin but a strong  
147 correlation (r, 0.37; p 0.00001) was evident among MICs of aspirin and minocycline for different  
148 bacteria.

149 ***Effect of aspirin on MIC of minocycline:*** A total of 164 strains of selected 24 genera (Tab. 2)  
150 were tested for determining MIC of minocycline in presence of 1.28 mg/mL, 0.64 mg/mL, 0.32  
151 mg/mL, 0.16 mg/mL, 0.08 mg/mL, 0.04 mg/mL,, 0.02 mg/mL, and 0.01 mg/mL aspirin.  
152 Observations revealed that MIC of minocycline increased when tested in presence of aspirin for  
153 *Bacillus* species strains and was not affected for strains of *Burkholderia cepacia*, *Geobacillus*  
154 *stearothermophilus*, *Moelerella wisconsensis*. However, a significant reduction in MIC of  
155 minocycline was evident for strains of the rest of the 20 genera included in the study. In the  
156 study reduction in MIC was dependent on the concentration of aspirin in the media. The most  
157 affected strains having a reduction in minocycline MIC in presence of even 0.01 mg/ mL aspirin  
158 belonged to *Enterobacter* spp., *Escherichia coli*, *Hafnia alvei*, *Raoultella terrigena* and  
159 *Staphylococcus* species.

160 Of 164 strains 57 strains classified as minocycline-resistant (MIC  $>4 \mu\text{g/mL}$ ) when tested  
161 for minocycline MIC in presence of 1.28 mg/mL, 0.64 mg/mL, 0.32 mg/mL, 0.16 mg/mL, 0.08

162 mg/mL, 0.04 mg/mL,, 0.02 mg/mL, and 0.01 mg/mL aspirin 32, 28, 23, 20, 20, 11, 10 and 1 (*E.*  
163 *coli*) strains become sensitive (MIC  $\leq$ 4  $\mu$ g/mL) to minocycline, respectively (Tab. 5). However,  
164 25 minocycline-resistant strains retained their resistant to minocycline even in presence of  
165 aspirin. At near therapeutic plasma concentration ( $\leq$ 10  $\mu$ g/mL) of aspirin only one minocycline-  
166 resistant *E. coli* strain turned sensitive to minocycline (MIC  $\leq$ 4  $\mu$ g/mL).

167 ***Effect of aspirin on MIC of doxycycline:*** A total of 148 strains of selected 18 genera (Tab. 3)  
168 were tested for determining MIC of doxycycline in presence of 1.28 mg/mL, 0.64 mg/mL, 0.32  
169 mg/mL, 0.16 mg/mL, 0.08 mg/mL, 0.04 mg/mL,, 0.02 mg/mL, and 0.01 mg/mL aspirin. Of the  
170 strains of 18 genera MIC of doxycycline got reduced for strains of 14 genera, increased for strains  
171 of *Aeromonas* spp. and *Bacillus* spp. and was not affected for strains of *R. terrigena* and  
172 *Paenibacillus* spp. The most affected strains to doxycycline in presence of aspirin even at 0.01  
173 mg/ mL were of *Enterococcus* spp. and *Staphylococcus* spp.

174 Of the 148 strains 49 strains classified as doxycycline-resistant (MIC  $>$ 4  $\mu$ g/mL) on  
175 testing for doxycycline MIC in presence of 1.28 mg/mL, 0.64 mg/mL, 0.32 mg/mL, 0.16 mg/mL,  
176 0.08 mg/mL, 0.04 mg/mL,, 0.02 mg/mL, and 0.01 mg/mL aspirin 30, 21, 18, 18, 15, 3  
177 (*Escherichia coli*, *E. fergusonii*, *Enterobacter agglomerans*), 1 (*Escherichia fergusonii*) and 0  
178 strains became sensitive (MIC  $\leq$ 4  $\mu$ g/mL) to doxycycline, respectively (Tab. 5). Of the 49  
179 doxycycline-resistant strains 19 remained resistant to doxycycline even in presence of aspirin. At  
180 near therapeutic plasma concentration ( $\leq$ 10  $\mu$ g/mL) of aspirin no doxycycline-resistant strains  
181 turned sensitive to doxycycline (MIC  $\leq$ 4  $\mu$ g/mL).

182 ***Effect of paracetamol on MIC of doxycycline:*** A total of 112 strains of selected 11 genera (Tab.  
183 4) were tested for determining MIC of doxycycline in presence of 1.28 mg/mL, 0.64 mg/mL,  
184 0.32 mg/mL, 0.16 mg/mL, 0.08 mg/mL, 0.04 mg/mL,, 0.02 mg/mL, and 0.01 mg/mL



185 acetoaminophen. The MIC of doxycycline reduced in presence of paracetamol for all but strains  
186 of *Moraxella* spp., *Proteus* spp. and *Pseudomonas* spp. The reduction in MIC of doxycycline  
187 was the most evident even at 0.01 mg/mL paracetamol for strains of doxycycline-sensitive (MIC  
188  $\leq 4$   $\mu\text{g/mL}$ ) strains of *Erwnia* spp., *Escherichia* spp. and *Klebsiella pneumoniae* ssp. *pneumoniae*.  
189 However, the MIC of doxycycline for *Bacillus* ssp., *Erwinia* spp. and *Streptococcus* ssp. strains  
190 was not affected by presence of paracetamol at 1.28 mg/ mL, 0.64-1.28 mg/ mL and 1.28 mg/  
191 mL, respectively.

192 Of the 112 strains 34 strains classified as doxycycline-resistant (MIC  $>4$   $\mu\text{g/mL}$ ) on  
193 testing for doxycycline MIC in presence of 1.28 mg/mL, 0.64 mg/mL, 0.32 mg/mL, 0.16 mg/mL,  
194 0.08 mg/mL, 0.04 mg/mL,, 0.02 mg/mL, and 0.01 mg/mL paracetamol 10, 11, 11, 10, 6, 1  
195 (*Streptococcus salivaris*), 0 and 0 strains became sensitive (MIC  $\leq 4$   $\mu\text{g/mL}$ ) to doxycycline,  
196 respectively (Tab. 3). Of the 34 doxycycline-resistant strains 23 remained resistant even in  
197 presence of paracetamol. At near therapeutic plasma concentration ( $\leq 40$   $\mu\text{g/mL}$ ) of paracetamol  
198 only one doxycycline-resistant strain of *S. salivaris* turned sensitive to doxycycline (MIC  $\leq 4$   
199  $\mu\text{g/mL}$ ).

## 200 Discussion

201 Though the MIC of doxycycline and minocycline for different bacteria to be classified as  
202 sensitive (16, 17) ranges between 0.25  $\mu\text{g/ mL}$  (for *Neisseria gonorrhoeae*) to  $\leq 4$   $\mu\text{g/ mL}$  (for  
203 members of Enterobacteriaceae and *Acinetobacter*), in the present study bacteria having MIC of  
204 doxycycline and minocycline  $\leq 4$   $\mu\text{g/ mL}$  were considered sensitive for the therapeutic purposes.  
205 Because, infections with MIC  $\leq 4$   $\mu\text{g/ mL}$  cab be treated effectively with doxycycline and  
206 minocycline as with therapeutic dosages it is an achievable plasma concentration of these drugs  
207 (16, 18). A total of 116 (39.59%) and 127 (43.34%) strains in the study were sensitive to

208 doxycycline and minocycline, respectively. In the region of the study similar pattern of  
209 doxycycline and minocycline resistance is reported earlier too (19).

210 The erratic distribution of 293 strains of bacteria according to the MICs of doxycycline  
211 and minocycline might be attributed due to diversity among strains as they belonged to 32 genera  
212 with different sensitivity patterns to antibiotics. The strong positive correlation ( $r$ , 0.51;  $p$   
213 0.00001) among MICs of doxycycline and minocycline might due to the fact that both the  
214 antibiotics are of the same tetracycline class (15).

215 The least MIC of aspirin was detected 40  $\mu\text{g}/\text{mL}$  for one strain each of *Staphylococcus*  
216 *xylosus* and *Streptococcus pyogenese*. Plasma concentration of aspirin ranges between 4.9-8.9  
217  $\mu\text{g}/\text{mL}$  in therapeutically applicable dosages and get converted to salicylate rapidly which may  
218 be in plasma with concentration of 42-62  $\mu\text{g}/\text{mL}$  and it may keep on increasing with chronic use  
219 of aspirin (20). Acute consumption of higher dosages more than 150 mg/kg may achieve higher  
220 plasma salicylate concentration but warrants an emergency detoxification treatment (21). The  
221 observations revealed that in therapeutically achievable concentration none of the bacterial strain  
222 in the study was treatable with aspirin.

223 At the maximum therapeutically achievable concentration (30  $\mu\text{g}/\text{mL}$ ) of paracetamol in  
224 plasma, none of 293 strains tested in the study could be classified sensitive to paracetamol as the  
225 minimum MIC detected was 5.12 mg/ mL, that too only for one strain each of *Serratia*  
226 *grimaceae* and *S. aureus* i.e., for practical purposes paracetamol cannot be considered  
227 antimicrobial. In an earlier study, *S. aureus* has been shown to be sensitive to acetaminophen at  
228 1.25 mg/ mL (22). The therapeutically useful plasma concentration of paracetamol may be  
229 between 10 to 20  $\mu\text{g}/\text{mL}$  and can be reached with oral as well intravenous use (23, 24).  
230 However, after a higher therapeutic dose on intravenous administration plasma concentration of

231 paracetamol can be reached up to 30  $\mu\text{g}/\text{mL}$ . In supra-therapeutic toxic dosages plasma  
232 concentration of paracetamol is reported even up to 1500  $\mu\text{g}/\text{mL}$  (24).

233 In the present study only 42 (14.33%) strains were sensitive to aspirin at  $\leq 1$   $\text{mg}/\text{mL}$   
234 concentration and none to paracetamol. Similarly, in an earlier study aspirin and paracetamol  
235 failed to contain growth of *Serratia*, *Bacillus* and *E. coli* strains at 1  $\text{mg}/\text{mL}$  concentration (25).  
236 Babik and coworkers (9) reported that aspirin failed to contain growth of *E. coli* and *S.*  
237 *epidermidis* at 1.5mg and 0.5  $\text{mg}/\text{mL}$  while paracetamol was not effective as antibacterial even  
238 at 3  $\text{mg}/\text{mL}$  concentration. In studies on *Campylobacter pylori* (now *Helicobacter pylori*) (26,  
239 27) both aspirin and paracetamol are shown to be antibacterial in therapeutic dosages. In the  
240 present study neither strain of *Campylobacter* nor of *Helicobacter* were included thus the  
241 observation are not comparable. In a study (8), acetyl salicylic acid tested against *E. coli* and *S.*  
242 *aureus* and reported MIC equivalent to 2  $\text{mg}/\text{mL}$ .

243 In the present study MIC of doxycycline increased in presence of aspirin for strains of  
244 *Aeromonas* spp. and *Bacillus* spp. and MIC of minocycline also increased in presence of aspirin  
245 for *Bacillus* spp. strains. Similar observations are reported by Hadera and coworkers (8) while  
246 evaluating aspirin in combination with ciprofloxacin and benzylpenicillin against *E. coli* and *S.*  
247 *aureus* and reported antagonistic drug interaction. However, in the present study, none of the *E.*  
248 *coli* and *S. aureus* and strains of other genera showed antagonism between aspirin / paracetamol  
249 and minocycline/ doxycycline.

250 In the study, aspirin converted a minocycline-resistant *E. coli* and doxycycline-resistant  
251 *S. salivaris* strains to sensitivity even at 10 $\mu\text{g}/\text{mL}$  levels of aspirin. However, a total of 32 out of  
252 57 minocycline-resistant strains became sensitive to minocycline and 30 of 42 doxycycline-  
253 resistant strain reverted to be sensitive to doxycycline in presence of 1280 $\mu\text{g}/\text{mL}$  levels of

254 aspirin. Earlier studies (28) reported that aspirin, sodium salicylate and sodium benzoate reverted  
255 colistin-resistant Enterobacteriaceae and *P. aeruginosa* to sensitivity. Chan and coworkers also  
256 (29) reported synergy between aspirin and antibiotics such as cefuroxime and chloramphenicol  
257 when administered against methicillin-resistant *Staphylococcus aureus*.

258 Observations indicated that synergy between aspirin and doxycycline/ minocycline might  
259 be strain-dependent. Observations are in concurrence to earlier studies. Ahmed and coworkers  
260 (7) reported no-synergistic interaction between aspirin and  $\beta$ -lactam antibiotics (ampicillin,  
261 amoxicillin, amoxicillin + clavulanic acid, cephalexin and cefotaxime) against *P. aeruginosa* and  
262 *K. pneumoniae* strains but reported synergistic action of aspirin with amoxicillin, cefotaxime,  
263 augmentin, gentamicin and ciprofloxacin against *E. coli* strains (6).

264 Paracetamol also showed synergistic activity with doxycycline and 11 of the 34  
265 doxycycline-resistant strains turned sensitive when tested in presence of paracetamol  $\leq 1.28$  mg/  
266 mL. Though there are several studies on interactions of NSAIDs with antibiotics, the interaction  
267 of the most commonly prescribed antipyretic paracetamol are rarely reported (30).

268 The synergy or adjuvant activity of aspirin and paracetamol with doxycycline and  
269 minocycline was strain-specific, within the same species of bacteria both revertible and non-  
270 revertible strains were present (Tab. 3). Thus, it is apparent that synergy between NSAIDs and  
271 antibiotics is modulated by bacterial factors rather than just combination of the two drugs.  
272 Further targeted studies may reveal genes/ factors responsible for synergy or no-synergy or  
273 antagonism between NSAIDs and antibiotics to help understanding the phenomenon and finally  
274 in development of a strategy to mitigate AMR and convert partly inefficient antibiotics to  
275 therapeutically useful ones, that is revival of outdated antibiotics.

276 The study concluded that neither aspirin nor paracetamol have potential antibacterial

277 activity at therapeutic dose levels. However, aspirin at 10.24 mg/ mL (1.024%) concentration  
278 inhibited all 293 strains in the study while paracetamol could not inhibit any but one strain each  
279 of *S. aureus* and *Serratia grimaceae* at the same concentration. Though aspirin cannot be used at  
280 the bacteria inhibiting concentration (1.024%) internally, its topical use either as lotion or  
281 ointment may be promising as a broad spectrum antibacterial even against the strains showing  
282 resistance to antibiotics. Further, the presence of aspirin converted 32 of 57 minocycline-resistant  
283 strains and 30 of 42 doxycycline-resistant strains to sensitivity. The synergy between aspirin  
284 even at 0.1% concentration level with minocycline and doxycycline can be utilized for the  
285 formulation of topical antibacterials. In contrast, paracetamol appeared almost ineffective as  
286 antibacterial even at >1% concentration and was also not as efficient adjuvant as aspirin to  
287 minocycline and doxycycline to increase their antibacterial activity. The study also indicated the  
288 need for more studies to reveal the mechanism underlying the interaction and synergy between  
289 NSAIDs and antibiotics.

## 290 **Acknowledgements**

291 The author is thankful to Mr. HC Joshi, Mr. G Tiwari, Mr. Pratap Singh, Mr. Laiqur Rahman and  
292 Mr. Ashok Kumar, Division of Epidemiology, ICAR-Indian Veterinary Research Institute,  
293 Izatnagar for their consistent technical assistance. The research work was supported by grants  
294 received from CAAST-ACLH (NAHEP/CAAST/2018-19).

## 295 **References**

- 296 1. Gajdács M. 2020. Non-antibiotic pharmaceutical agents as antibiotic adjuvants. Acta  
297 Biologica Szegediensis 64:17-23.
- 298 2. Miró-Canturri A, Ayerbe-Algaba R, Smani Y. 2019. Drug repurposing for the treatment of  
299 bacterial and fungal infections. Front Microbiol 10:41 doi: 10.3389/fmicb.2019.00041.

- 300 3. Khan S, Dhama K, Patel SK, Pathak M, Tiwari R, Singh BR, Shah R, Bonilla-Ardana K,  
301 Rodriguez-Morales AJ, Leblebicioglu H. 2020. Ivermectin, a new candidate therapeutic  
302 against SARS-CoV-2/COVID-19. *Annals Clin Microbiol Antimicrobials* 19: 23 doi:  
303 10.1186/s12941-020-00368-w.
- 304 4. Lagadinou M, Onisor MO, Rigas A, Musetescu D, Gkentzi D, Assimakopoulos SF, Panosand  
305 G. Markos Marangos M. 2020. Antimicrobial properties on non-antibiotic drugs in the era of  
306 increased bacterial resistance. *Antibiotics* 9:107 doi:10.3390/antibiotics9030107.
- 307 5. Leão RP; Cruz JV, da Costa GV, Cruz JN, Ferreira EFB, Silva RC, de Lima LR, Borges RS,  
308 dos Santos GB, Santos CBR. 2020. Identification of new rofecoxib-based cyclooxygenase-2  
309 inhibitors: a bioinformatics approach. *Pharmaceuticals* 13:209.
- 310 6. Ahmed EFR, Abd El-Baky RM, Ahmed ABF, Fawzy NG, Aziz NA, Gad GFM. 2016.  
311 Evaluation of antibacterial activity of some non-steroidal anti-inflammatory drugs against  
312 *Escherichia coli* causing urinary tract infection. *African J Microbiol Res* 10:1408-1416.
- 313 7. Ahmed EFR, El-baky MA, Ahmed ABF, Waly NG, Gad GFM. 2017. Antibacterial activity of  
314 some non-steroidal anti-inflammatory drugs against bacteria causing urinary tract infection.  
315 *Am J Infect Dis Microbiol* 5:66–73.
- 316 8. Hadera M, Selam Mehari S, Saleem Basha S, Nebyu D, Amha ND, Berhane Y. 2018. Study  
317 on antimicrobial potential of selected non-antibiotics and its interaction with conventional  
318 antibiotics. *UK. J. Pharm. Biosci.* 6:1-7
- 319 9. Babik M. 2021. Utilizing the antimicrobial effects of antipyretics through synergistic  
320 combination with other FDA approved drugs. *Research Gate* doi:  
321 10.13140/RG.2.2.10337.63841.

- 322 10. Chow JH, Khanna AK, Kethireddy S, Yamane D, Levine A, Jackson A, McCurdy MT. et al.  
323 2021. Aspirin use is associated with decreased mechanical ventilation, intensive care unit  
324 admission, and in-hospital mortality in hospitalized patients with Coronavirus Disease 2019.  
325 *Anesthesia Analgesia* 132:930-941. doi: 10.1213/ANE.0000000000005292.
- 
- 326 11. Ministry of Health and Family Welfare, Govt. of India. 2021. Revised guidelines for home  
327 isolation of mild /asymptomatic COVID-19 cases.  
328 [https://www.mohfw.gov.in/pdf/RevisedguidelinesforHomeIsolationofmildasymptomaticCO](https://www.mohfw.gov.in/pdf/RevisedguidelinesforHomeIsolationofmildasymptomaticCOVID19cases.pdf)  
329 [VID19cases.pdf](https://www.mohfw.gov.in/pdf/RevisedguidelinesforHomeIsolationofmildasymptomaticCOVID19cases.pdf)
- 330 12. Yates PA, Newman SA, Oshry LJ, Glassman RH, Leone AM, Reichel E. 2020. Doxycycline  
331 treatment of high-risk COVID-19-positive patients with comorbid pulmonary disease. *Ther*  
332 *Adv Respir Dis* 14:1753466620951053 doi: 10.1177/1753466620951053.
- 333 13. Francini E, Miano ST, Fiaschi AI, Francini G. 2020. Doxycycline or minocycline may be a  
334 viable treatment option against SARS-CoV-2. *Med Hypotheses* 144:110054.  
335 doi:10.1016/j.mehy.2020.110054
- 336 14. Singh H, Kakkar AK, Chauhan P. 2020. Repurposing minocycline for COVID-19  
337 management: mechanisms, opportunities, and challenges. *Expert Rev Anti Infect Ther*  
338 18:997-1003 doi: 10.1080/14787210.2020.1782190.
- 
- 339 15. Singh BR. 2009. *Labtop for microbiology laboratory*. Lambert Academic Publishing, AG &  
340 Co. KG, Berlin, Germany.
- 341 16. CLSI. 2014. Performance standards for antimicrobial disk susceptibility tests, in: Institute.  
342 Clinical and Laboratory Standards Institute, Wayne, Pennsylvania.

- 343 17. CLSI, 2015. Methods for Antimicrobial Dilution and Disk Susceptibility Testing of  
344 Infrequently Isolated or Fastidious Bacteria. Clinical and Laboratory Standards Institute,  
345 Wayne, USA.
- 346 18. Cunha BA, Domenico P, Cunha C. 2000. Pharmacodynamics of doxycycline. Clin Microbiol  
347 Infect 6: 270-273. <https://doi.org/10.1046/j.1469-0691.2000.00058-2.x>
- 348 19. Singh BR. 2018. ESKAPE Pathogens in animals and their antimicrobial drug resistance  
349 pattern. J Dairy Vet Anim Res 7(3):10 doi: 10.19080/JDVS.2018.07.555715.
- 350 20. National Center for Biotechnology Information. 2021. PubChem compound summary for  
351 CID 2244, aspirin. <https://pubchem.ncbi.nlm.nih.gov/compound/Aspirin>.
- 352 21. Chyka PA, Erdman AR, Christianson G, Wax PM, Booze LL, Manoguerra AS, Caravati EM,  
353 Nelson LS, Olson KR, Cobaugh DJ, Scharman EJ, Woolf AD, Troutman WG. 2007.  
354 Salicylate poisoning: an evidence-based consensus guideline for out-of-hospital  
355 management. Clin Toxicol (Phila) 45:95-131 doi: 10.1080/15563650600907140.
- 356 22. Al-Janabi AA. 2010. *In vitro* antibacterial activity of ibuprofen and acetaminophen. J Glob  
357 Infect Dis 2:105-108. doi:10.4103/0974-777X.62880
- 358 23. Rumack BH. 1978. Aspirin versus acetaminophen: a comparative view. Pediatrics 62(5 Pt 2  
359 Suppl):943-946.
- 360 24. Medsafe. 2012. New Zealand Data Sheet. Paracetamol AFT inf.  
361 <https://www.medsafe.govt.nz/profs/Datasheet/p/paracetamolAFTinf.pdf>
- 362 25. Lawal A, Obaleye JA. 2008. Synthesis, Characterization and antibacterial activity of aspirin  
363 and paracetamol-metal complexes. Nigerian Soc Exp Biol  
364 <https://tspace.library.utoronto.ca/handle/1807/44715>



- 365 26. Caselli M, Pazzi P, LaCorte R, Aleotti A, Trevisani L, Stabellini G. 1989. *Campylobacter-*  
366 like organisms, nonsteroidal anti-inflammatory drugs and gastric lesions in patients with  
367 rheumatoid arthritis. *Digestion* 44:101-104.
- 368 27. Wang WH, Wong WM, Dailidienne D, Berg DE, Gu Q, Lai KC, Lam SK, Wong BC. 2003.  
369 Aspirin inhibits the growth of *Helicobacter pylori* and enhances its susceptibility to  
370 antimicrobial agents. *Gut* 52:490-495.
- 371 28. Malla CF, Mireles NA, Ramírez AS, Poveda JB, Tavío MM. 2020. Aspirin, sodium benzoate  
372 and sodium salicylate reverse resistance to colistin in Enterobacteriaceae and *Pseudomonas*  
373 *aeruginosa*. *J Antimicrob Chemother* 75:3568-3575. doi: 10.1093/jac/dkaa371
- 374 29. Chan EWL, Yee YZ, Raja I, Yap JKY. 2017. Synergistic effect of non-steroidal anti-  
375 inflammatory drugs (NSAIDs) on antibacterial activity of cefuroxime and chloramphenicol  
376 against methicillin-resistant *Staphylococcus aureus*. *J Glob Antimicrob Resist* 10:70-74.
- 377 30. InformedHealth.org. 2016. Cologne, Germany: Institute for Quality and Efficiency in Health  
378 Care (IQWiG); 2006-. Using medication: The safe use of over-the-counter painkillers.  
379 <https://www.ncbi.nlm.nih.gov/books/NBK361006/>

380

381

382

383

384

385

386

387

388 **Table. 1. The minimum inhibitory concentration (MIC) of aspirin, paracetamol,**  
 389 **doxycycline and minocycline for different strains of bacteria**

| Genus of Bacteria           | Species of bacteria, numbers of strains tested                                                                                                               | Average MIC in $\mu\text{g/ mL}$ (Standard Deviation), resistant strains ( $\text{MIC} \geq 4 \mu\text{g/ mL}$ ) |                 | Average MIC in $\text{mg/ mL}$ (Standard Deviation), resistant strains ( $\text{MIC} \geq 1.28 \text{ mg/ mL}$ ) |             |
|-----------------------------|--------------------------------------------------------------------------------------------------------------------------------------------------------------|------------------------------------------------------------------------------------------------------------------|-----------------|------------------------------------------------------------------------------------------------------------------|-------------|
|                             |                                                                                                                                                              | Doxycycline                                                                                                      | Minocycline     | Aspirin                                                                                                          | Paracetamol |
| <i>Acinetobacter</i>        | <i>A. alcaligenes</i> 1, <i>A. calcoaceticus</i> 1, <i>A. lwoffii</i> 2                                                                                      | 2.75 (3.5) 1                                                                                                     | 2.38 (3.8) 1    | 1.36 (0.9) 1                                                                                                     | >10.24      |
| <i>Aerococcus</i>           | <i>Aerococcus</i> spp. 2                                                                                                                                     | 2.5 (2.1) 0                                                                                                      | 0.56 (0.6) 0    | 1.44 (1.6) 1                                                                                                     | >10.24      |
| <i>Aeromonas</i>            | <i>A. bestiarum</i> 5, <i>A. eucranophila</i> 2, <i>A. media</i> 2, <i>A. popoffii</i> 3, <i>A. salmonicida</i> 1, <i>A. schubertii</i> 1, <i>A. trota</i> 2 | 87.45 (141.6) 9                                                                                                  | 81.61 (144.1) 7 | 1.81 (1.2) 7                                                                                                     | >10.24      |
| <i>Alcaligenes faecalis</i> | <i>Alcaligenes faecalis</i> 1                                                                                                                                | 0.50 (NA) 0                                                                                                      | 0.50 (NA) 0     | 0.64 (NA) 0                                                                                                      | >10.24      |
| <i>Bacillus</i>             | <i>B. amyloleticus</i> 1, <i>B. badius</i> 1, <i>B. brevis</i> 1, <i>B. cereus</i> 3, <i>B. megaterium</i> 1, <i>B.</i>                                      | 9.69 (20.5) 2                                                                                                    | 8.50 (20.9) 1   | 1.72 (0.9) 4                                                                                                     | >10.24      |

|                       |                                                                                                                                                     |                      |                      |                  |        |
|-----------------------|-----------------------------------------------------------------------------------------------------------------------------------------------------|----------------------|----------------------|------------------|--------|
|                       | <i>mycoides</i> 1, <i>B. sphaericus</i><br>1                                                                                                        |                      |                      |                  |        |
| <i>Brucella</i>       | <i>B. abortus</i> 3                                                                                                                                 | 0.50 (0.0) 0         | 0.50 (0.0) 0         | 0.32 (0.0)<br>0  | >10.24 |
| <i>Burkholderia</i>   | <i>B. cepacia</i> 1                                                                                                                                 | 512.00<br>(NA) 1     | 128.00<br>(NA) 1     | 10.24<br>(NA) 1  | >10.24 |
| <i>Edwardsiella</i>   | <i>E. tarda</i> 3                                                                                                                                   | 352.0<br>(277.1) 3   | 182.67<br>(285.6) 2  | 1.07(0.4)<br>0   | >10.24 |
| <i>Enterobacter</i>   | <i>E. agglomerans</i> 10, <i>E. gregoviae</i> 1                                                                                                     | 148.64<br>(194.0) 8  | 81.0<br>(148.3) 8    | 2.44 (1.5)<br>6  | >10.24 |
| <i>Enterococcus</i>   | <i>E. durans</i> 1, <i>E. faecalis</i> 4,<br><i>E. faecium</i> 5, <i>E. solitarius</i> 3                                                            | 250.43<br>(199.2) 12 | 197.86<br>(199.7) 12 | 2.03 (1.5)<br>6  | >10.24 |
| <i>Erwinia</i>        | <i>E. amylovora</i> 2, <i>E. aphidicola</i> 1, <i>E. carotovora</i> 1, <i>E. nimipressuralis</i> 1, <i>E. stewartii</i> 1, <i>E. tasmaniensis</i> 1 | 76.29<br>(192.1) 2   | 76.29<br>(192.1) 2   | 2.29 (0.7)<br>6  | >10.24 |
| <i>Escherichia</i>    | <i>E. coli</i> 54, <i>E. fergusonii</i> 3,<br><i>E. hermannii</i> 1                                                                                 | 139.19<br>(199.0) 45 | 78.21<br>(144.5) 44  | 2.08 (1.1)<br>29 | >10.24 |
| <i>Flexibacter</i>    | <i>Flexibacter</i> spp. 2                                                                                                                           | 1.00 (0.0) 0         | 0.25 (0.0) 0         | 0.64 (0.0)<br>0  | >10.24 |
| <i>Gallibacterium</i> | <i>G. anatis</i> 2                                                                                                                                  | 80.00<br>(67.9) 2    | 80.00<br>(67.9) 2    | 2.56 (0.0)<br>2  | >10.24 |

|                      |                                                                         |                       |                      |                  |        |
|----------------------|-------------------------------------------------------------------------|-----------------------|----------------------|------------------|--------|
| <i>Gardnerella</i>   | <i>Gardnerella</i> spp. 1                                               | 512.00<br>(NA) 1      | 32.00 (NA)<br>1      | 1.28 (NA)<br>0   | >10.24 |
| <i>Geobacillus</i>   | <i>G. stearothermophilus</i> 6                                          | 23.50<br>(51.3) 2     | 21.50<br>(52.2) 1    | 1.92 (1.7)<br>2  | >10.24 |
| <i>Hafnia</i>        | <i>H. alvei</i> 12                                                      | 176.50<br>(215.8) 9   | 124.79<br>(288.1) 9  | 1.97 (0.7)<br>7  | >10.24 |
| <i>Klebsiella</i>    | <i>K. oxytoca</i> 2, <i>K. pneumoniae</i> 15                            | 162.00<br>(208.9) 16  | 158.38<br>(211.5) 14 | 3.54 (2.2)<br>14 | >10.24 |
| <i>Kocuria</i>       | <i>K. rosae</i> 1                                                       | 0.50 (NA)<br>0        | 0.50 (NA)<br>0       | 0.32 (NA)<br>0   | >10.24 |
| <i>Micrococcus</i>   | <i>M. luteus</i> 1                                                      | 128.00<br>(NA) 1      | 0.25 (NA)<br>0       | 0.32 (NA)<br>0   | >10.24 |
| <i>Moelerella</i>    | <i>M. wisconsensis</i> 1                                                | 128.00<br>(NA) 1      | 1.00 (NA)<br>0       | 1.28 (NA)<br>0   | >10.24 |
| <i>Moraxella</i>     | <i>M. bovis</i> 1, <i>M. osloensis</i> 1,<br><i>M. phenylpyruvica</i> 1 | 6.33 (8.4) 1          | 6.08 (8.6) 1         | 1.81 (1.3)<br>2  | >10.24 |
| <i>Paenibacillus</i> | <i>P. lactis</i> 1, <i>P. larvae</i> 1, <i>P. pantothenicus</i> 13      | 13.41<br>(32.3) 6     | 2.27 (4.3) 2         | 1.00 (0.8)<br>3  | >10.24 |
| <i>Pasteurella</i>   | <i>P. canis</i> 2, <i>P. multocida</i> 1                                | 2.71 (2.2) 0          | 2.71 (2.2) 0         | 1.07 (1.3)<br>1  | >10.24 |
| <i>Proteus</i>       | <i>P. mirabilis</i> 5, <i>P. penneri</i><br>1, <i>P. vulgaris</i> 1     | 338.29.0<br>(217.7) 7 | 110.29<br>(182.1) 6  | 2.19 (1.4)<br>3  | >10.24 |
| <i>Pseudomonas</i>   | <i>P. aeruginosa</i> 5, <i>P.</i>                                       | 220.57                | 165.71               | 5.85 (4.3)       | >10.24 |

|                       |                                                                                                                                                                                                                                                                                                                                                                                                                                             |                     |                      |                  |         |
|-----------------------|---------------------------------------------------------------------------------------------------------------------------------------------------------------------------------------------------------------------------------------------------------------------------------------------------------------------------------------------------------------------------------------------------------------------------------------------|---------------------|----------------------|------------------|---------|
|                       | <i>paucimobilis</i> 1, <i>P. pseudoalcaligenes</i> 1                                                                                                                                                                                                                                                                                                                                                                                        | (203.8) 7           | (159.1) 7            | 5                |         |
| <i>Raoultella</i>     | <i>R. terrigena</i> 6                                                                                                                                                                                                                                                                                                                                                                                                                       | 90.17<br>(128.6) 4  | 52.83<br>(100.1) 4   | 2.88 (1.9)<br>4  | >10.24  |
| <i>Salmonella</i>     | <i>S. kentucky</i> 1, <i>S. Typhimurium</i> 3, <i>S. Virchow</i> 1                                                                                                                                                                                                                                                                                                                                                                          | 124.80<br>(217.7) 5 | 24.00<br>(24.7) 5    | 2.56 (1.6)<br>3  | >10.24  |
| <i>Serratia</i>       | <i>S. fonticola</i> 1, <i>S. grimaceae</i> 2, <i>S. marcescens</i> 2, <i>S. odorifera</i> 2                                                                                                                                                                                                                                                                                                                                                 | 149.29<br>(247.8) 3 | 149.29<br>(247.8) 3  | 2.56 (0.0)<br>7  | >10.24* |
| <i>Staphylococcus</i> | <i>S. arlettae</i> 1, <i>S. aureus</i> 9, <i>S. capitis</i> ssp. <i>capitis</i> 3, ssp. <i>urealyticus</i> 1, <i>S. caseolytus</i> 1, <i>S. chromogenes</i> 2, <i>S. delphini</i> 4, <i>S. epidermidis</i> 10, <i>S. equorum</i> 1, <i>S. gallinarum</i> 1, <i>S. haemolyticus</i> 6, <i>S. hominis</i> 6, <i>S. hyicus</i> 1, <i>S. lentus</i> 1, <i>S. lugdunensis</i> 4, <i>S. schleiferi</i> 1, <i>S. sciuri</i> 1, <i>S. xylosus</i> 1 | 48.67<br>(108.3) 21 | 135.57<br>(208.5) 26 | 3.72 (3.6)<br>29 | >10.24* |
| <i>Streptococcus</i>  | <i>S. milleri</i> 5, <i>S. pneumoniae</i>                                                                                                                                                                                                                                                                                                                                                                                                   | 169.19              | 88.2                 | 2.17 (1.5)       | >10.24  |

|                    |                                                                                        |                           |                          |                    |                   |
|--------------------|----------------------------------------------------------------------------------------|---------------------------|--------------------------|--------------------|-------------------|
|                    | 2, <i>S. porcinus</i> 1, <i>S. pyogenes</i> 1, <i>S. suis</i> 3, <i>S. salivaris</i> 1 | (238.9) 7                 | (188.9) 6                | 6                  |                   |
| <i>Xenorhabdus</i> | <i>X. bovienni</i> 1                                                                   | 8.00 (NA)<br>1            | 8.00 (NA)<br>1           | 2.56 (NA)<br>1     | >10.24            |
| Total              | 293                                                                                    | 115.87<br>(182.46)<br>177 | 93.05<br>(172.20)<br>166 | 2.47<br>(2.27) 150 | NA<br>(NA)<br>293 |

390

391

392

393

394

395

396

397

398

399

400

401

402

403

404 **Table 2. The minimum inhibitory concentration (MIC) minocycline for different strains of bacteria in presence of aspirin.**

| Genus of bacteria tested | Species of bacteria tested and their numbers                                                                   | Minimum concentration of aspirin (mg/ mL) having MIC decreasing effect | Percent decrease in MIC of minocycline in presence of aspirin (mg/ mL) |        |        |        |        |        |        |        |
|--------------------------|----------------------------------------------------------------------------------------------------------------|------------------------------------------------------------------------|------------------------------------------------------------------------|--------|--------|--------|--------|--------|--------|--------|
|                          |                                                                                                                |                                                                        | 1.28                                                                   | 0.64   | 0.32   | 0.16   | 0.08   | 0.04   | 0.02   | 0.01   |
| <i>Acinetobacter</i>     | <i>A. alcaligenes</i> 1, <i>A. lwoffii</i> 2                                                                   | 0.04                                                                   | 0.94                                                                   | 0.93   | 0.93   | 0.91   | 0.64   | 0.34   | 0.00   | 0.00   |
| <i>Aeromonas</i>         | <i>A. bestiarum</i> 1, <i>A. eucranophila</i> 2, <i>A. media</i> 2, <i>A. popoffi</i> 2, <i>A. scubertii</i> 2 | 1.28                                                                   | 0.18                                                                   | 0.00   | 0.00   | 0.00   | 0.00   | 0.00   | 0.00   | 0.00   |
| <i>Alcaligenes</i>       | <i>Alcaligenes faecalis</i>                                                                                    | 0.64                                                                   | 0.75                                                                   | 0.50   | 0.00   | 0.00   | 0.00   | 0.00   | 0.00   | 0.00   |
| <i>Bacillus</i>          | <i>B. brevis</i> 1, <i>B. cereus</i> 2,                                                                        | NA                                                                     | -24.70                                                                 | -18.30 | -24.70 | -24.70 | -24.70 | -18.30 | -15.10 | -13.50 |

|                           |                                                                                            |      |      |      |      |      |      |      |      |      |
|---------------------------|--------------------------------------------------------------------------------------------|------|------|------|------|------|------|------|------|------|
|                           | <i>B. megaterium</i> 1, <i>B. mycooides</i> 1                                              |      |      |      |      |      |      |      |      |      |
| <i>Burkholderia</i>       | <i>Burkholderia cepacia</i> 1                                                              | NA   | 0.00 | 0.00 | 0.00 | 0.00 | 0.00 | 0.00 | 0.00 | 0.00 |
| <i>Edwardsiella tarda</i> | <i>Edwardsiella tarda</i> 1                                                                | 0.02 | 0.99 | 0.98 | 0.97 | 0.93 | 0.86 | 0.78 | 0.78 | 0.00 |
| <i>Enterobacter</i>       | <i>E. agglomerans</i> 5, <i>E. gregoviae</i> 1                                             | 0.01 | 0.97 | 0.94 | 0.88 | 0.98 | 0.97 | 0.97 | 0.95 | 0.93 |
| <i>Enterococcus</i>       | <i>E. faecalis</i> 3, <i>E. faecium</i> 6, <i>E. malodoratus</i> 1, <i>E. solitarius</i> 2 | 0.02 | 0.99 | 0.99 | 0.99 | 0.98 | 0.96 | 0.87 | 0.83 | 0.00 |
| <i>Escherichia</i>        | <i>E. coli</i> 25, <i>E. fergusonii</i> 3, <i>E. hermani</i> 1                             | 0.01 | 0.91 | 0.85 | 0.71 | 0.74 | 0.72 | 0.69 | 0.66 | 0.55 |
| <i>Flexibacter</i>        | <i>Flexibacter</i> spp. 2                                                                  | 0.04 | 0.89 | 0.78 | 0.69 | 0.56 | 0.50 | 0.25 | 0.00 | 0.00 |
| <i>Geobacillus</i>        | <i>Geobacillus stearothermophilus</i> 3                                                    | NA   | 0.00 | 0.00 | 0.00 | 0.00 | 0.00 | 0.00 | 0.00 | 0.00 |
| <i>Hafnia</i>             | <i>Hafnia alvei</i> 6                                                                      | 0.01 | 0.32 | 0.31 | 0.29 | 0.20 | 0.20 | 0.20 | 0.20 | 0.20 |



|                      |                                                                                                     |      |      |      |      |      |      |      |      |      |
|----------------------|-----------------------------------------------------------------------------------------------------|------|------|------|------|------|------|------|------|------|
| <i>Klebsiella</i>    | <i>Klebsiella pneumoniae</i><br>ssp. <i>pneumoniae</i> 12                                           | 0.16 | 0.68 | 0.29 | 0.18 | 0.11 | 0.00 | 0.00 | 0.00 | 0.00 |
| <i>Kocuria rosea</i> | <i>Kocuria rosea</i>                                                                                | 0.64 | 0.75 | 0.50 | 0.00 | 0.00 | 0.00 | 0.00 | 0.00 | 0.00 |
| <i>Micrococcus</i>   | <i>Micrococcus luteus</i> 1                                                                         | 1.28 | 0.50 | 0.00 | 0.00 | 0.00 | 0.00 | 0.00 | 0.00 | 0.00 |
| <i>Moelerella</i>    | <i>Moelerella wisconsensis</i><br>1                                                                 | NA   | 0.00 | 0.00 | 0.00 | 0.00 | 0.00 | 0.00 | 0.00 | 0.00 |
| <i>Moraxella</i>     | <i>M. bovis</i> 1, <i>M. ovis</i> 1                                                                 | 0.64 | 0.50 | 0.50 | 0.00 | 0.00 | 0.00 | 0.00 | 0.00 | 0.00 |
| <i>Paenibacillus</i> | <i>P. lactis</i> 1, <i>P. larvae</i> 1, <i>P.</i><br><i>pantothenicus</i> 10                        | 0.64 | 0.50 | 0.50 | 0.00 | 0.00 | 0.00 | 0.00 | 0.00 | 0.00 |
| <i>Proteus</i>       | <i>P. mirabilis</i> 5, <i>P. penneri</i><br>1, <i>P. vulgaris</i> 1                                 | 0.64 | 0.20 | 0.13 | 0.00 | 0.00 | 0.00 | 0.00 | 0.00 | 0.00 |
| <i>Pseudomonas</i>   | <i>P. aeruginosa</i> 5, <i>P.</i><br><i>paucimobilis</i> 1, <i>P.</i><br><i>pseudoalcaligenes</i> 1 | 0.16 | 0.20 | 0.19 | 0.17 | 0.04 | 0.00 | 0.00 | 0.00 | 0.00 |
| <i>Raoultella</i>    | <i>Raoultella terrigena</i> 3                                                                       | 0.01 | 0.54 | 0.25 | 0.21 | 0.14 | 0.14 | 0.14 | 0.14 | 0.14 |
| <i>Salmonella</i>    | <i>S. Kentucky</i> 1, <i>S.</i>                                                                     | 0.64 | 0.52 | 0.20 | 0.00 | 0.00 | 0.00 | 0.00 | 0.00 | 0.00 |

|                       |                                                                                                                                                                                                                                                                                                                                                                                                                                                 |      |      |      |      |      |      |      |      |      |
|-----------------------|-------------------------------------------------------------------------------------------------------------------------------------------------------------------------------------------------------------------------------------------------------------------------------------------------------------------------------------------------------------------------------------------------------------------------------------------------|------|------|------|------|------|------|------|------|------|
|                       | <i>Naestwed</i> 1, <i>S.</i><br><i>Typhimurium</i> 2                                                                                                                                                                                                                                                                                                                                                                                            |      |      |      |      |      |      |      |      |      |
| <i>Staphylococcus</i> | <i>S. aureus</i> 4, <i>S. capitis</i><br>ssp. <i>capitis</i> 1, ssp.<br><i>urealyticus</i> 1, <i>S.</i><br><i>caseolytus</i> 1, <i>S.</i><br><i>chromogenes</i> 1, <i>S.</i><br><i>delphini</i> 4, <i>S. epidermidis</i><br>3, <i>S. gallinarum</i> 1, <i>S.</i><br><i>haemolyticus</i> 4, <i>S.</i><br><i>hominis</i> 2, <i>S. hyicus</i> 1, <i>S.</i><br><i>lentus</i> 1, <i>S. lugdunensis</i> 1,<br><i>S. sciuri</i> 1, <i>S. xylosus</i> 1 | 0.01 | 0.96 | 0.90 | 0.77 | 0.87 | 0.87 | 0.86 | 0.86 | 0.86 |
| <i>Streptococcus</i>  | <i>S. milleri</i> 3, <i>S.</i><br><i>pneumoniae</i> 2, <i>S.</i><br><i>pyogenes</i> 1, <i>S. salivaris</i> 1                                                                                                                                                                                                                                                                                                                                    | 0.02 | 0.84 | 0.83 | 0.75 | 0.67 | 0.67 | 0.42 | 0.08 | 0.00 |

406

407

408

409 **Table 3. The minimum inhibitory concentration (MIC) doxycycline for different strains of bacteria in presence of aspirin.**

| Genus of bacteria tested | Species of bacteria tested and their numbers                                                                   | Minimum concentration of aspirin (mg/ mL) having MIC decreasing effect | Percent decrease in MIC of doxycycline in presence of aspirin (mg/ mL) |       |       |       |       |       |      |      |
|--------------------------|----------------------------------------------------------------------------------------------------------------|------------------------------------------------------------------------|------------------------------------------------------------------------|-------|-------|-------|-------|-------|------|------|
|                          |                                                                                                                |                                                                        | 1.28                                                                   | 0.64  | 0.32  | 0.16  | 0.08  | 0.04  | 0.02 | 0.01 |
| <i>Aeromonas</i>         | <i>A. bestiarum</i> 1, <i>A. eucranophila</i> 2, <i>A. media</i> 2, <i>A. popoffi</i> 2, <i>A. scubertii</i> 2 | NA                                                                     | -0.28                                                                  | -0.56 | -0.56 | -0.56 | -0.56 | -0.56 | 0.00 | 0.00 |
| <i>Bacillus</i>          | <i>B. brevis</i> 1, <i>B. cereus</i> 2,                                                                        | NA                                                                     | -17.09                                                                 | -8.14 | 0.00  | 0.00  | 0.00  | 0.00  | 0.00 | 0.00 |

|                     |                                                                                            |      |        |      |      |      |      |      |      |       |
|---------------------|--------------------------------------------------------------------------------------------|------|--------|------|------|------|------|------|------|-------|
|                     | <i>B. megaterium</i> 1, <i>B. mycooides</i> 1                                              |      |        |      |      |      |      |      |      |       |
| <i>Edwardsiella</i> | <i>Edwardsiella tarda</i>                                                                  | 0.04 | -1.00  | 0.49 | 0.49 | 0.49 | 0.49 | 0.25 | 0.00 | -0.50 |
| <i>Enterobacter</i> | <i>E. agglomerans</i> 5, <i>E. gregoviae</i> 1                                             | 0.02 | 0.99   | 0.98 | 0.95 | 0.92 | 0.88 | 0.71 | 0.44 | 0.00  |
| <i>Enterococcus</i> | <i>E. faecalis</i> 3, <i>E. faecium</i> 6, <i>E. malodoratus</i> 1, <i>E. solitarius</i> 2 | 0.01 | 1.00   | 1.00 | 1.00 | 1.00 | 1.00 | 0.94 | 0.88 | 0.75  |
| <i>Erwinia</i>      | <i>Erwinia stewartii</i>                                                                   | 0.64 | 1.00   | 0.50 | 0.00 | 0.00 | 0.00 | 0.00 | 0.00 | 0.00  |
| <i>Escherichia</i>  | <i>E. coli</i> 25, <i>E. fergusonii</i> 3, <i>E. hermani</i> 1                             | 0.08 | 0.67   | 0.46 | 0.23 | 0.18 | 0.07 | 0.00 | 0.00 | 0.00  |
| <i>Flexibacter</i>  | <i>Flexibacter</i> spp. 2                                                                  | 0.32 | 0.38   | 0.38 | 0.25 | 0.25 | 0.00 | 0.00 | 0.00 | 0.00  |
| <i>Geobacillus</i>  | <i>Geobacillus stearothermophilus</i> 3                                                    | 0.02 | -7.13  | 0.63 | 0.50 | 0.50 | 0.25 | 0.25 | 0.25 | 0.00  |
| <i>Hafnia</i>       | <i>Hafnia alvei</i> 6                                                                      | 0.02 | -20.35 | 0.94 | 0.88 | 0.75 | 0.75 | 0.75 | 0.50 | 0.00  |
| <i>Klebsiella</i>   | <i>Klebsiella pneumoniae</i>                                                               | 0.02 | 0.91   | 0.81 | 0.69 | 0.66 | 0.62 | 0.53 | 0.35 | 0.00  |

|                       |                                                                                                                                                    |      |      |      |      |      |      |      |      |      |
|-----------------------|----------------------------------------------------------------------------------------------------------------------------------------------------|------|------|------|------|------|------|------|------|------|
|                       | <i>ssp. pneumoniae</i> 12                                                                                                                          |      |      |      |      |      |      |      |      |      |
| <i>Moraxella</i>      | <i>M. bovis</i> 1, <i>M. ovis</i> 1                                                                                                                | 0.64 | 0.99 | 0.99 | 0.00 | 0.00 | 0.00 | 0.00 | 0.00 | 0.00 |
| <i>Paenibacillus</i>  | <i>P. lactis</i> 1, <i>P. larvae</i> 1, <i>P. pantothenicus</i> 10                                                                                 | NA   | 0.00 | 0.00 | 0.00 | 0.00 | 0.00 | 0.00 | 0.00 | 0.00 |
| <i>Pasteurella</i>    | <i>P. canis</i> 1, <i>P. multocida</i> 1                                                                                                           | 0.04 | 0.94 | 0.88 | 0.88 | 0.88 | 0.88 | 0.50 | 0.00 | 0.00 |
| <i>Proteus</i>        | <i>P. mirabilis</i> 7, <i>P. penneri</i> 1, <i>P. vulgaris</i> 1                                                                                   | 0.64 | 0.20 | 0.10 | 0.00 | 0.00 | 0.00 | 0.00 | 0.00 | 0.00 |
| <i>Pseudomonas</i>    | <i>P. aeruginosa</i> 5, <i>P. paucimobilis</i> 1, <i>P. pseudoalcaligenes</i> 1                                                                    | 0.64 | 0.98 | 0.50 | 0.00 | 0.00 | 0.00 | 0.00 | 0.00 | 0.00 |
| <i>Raoultella</i>     | <i>Raoultella terrigena</i> 3                                                                                                                      | NA   | 0.00 | 0.00 | 0.00 | 0.00 | 0.00 | 0.00 | 0.00 | 0.00 |
| <i>Staphylococcus</i> | <i>S. aureus</i> 4, <i>S. capitis</i> ssp. <i>capitis</i> 1, ssp. <i>urealyticus</i> 1, <i>S. caseolytus</i> 1, <i>S. chromogenes</i> 1, <i>S.</i> | 0.01 | 0.88 | 0.84 | 0.75 | 0.75 | 0.71 | 0.61 | 0.41 | 0.33 |

|                                                                                                                                                                                                                                                                 |  |  |  |  |  |  |  |  |  |
|-----------------------------------------------------------------------------------------------------------------------------------------------------------------------------------------------------------------------------------------------------------------|--|--|--|--|--|--|--|--|--|
| <i>delphini</i> 4, <i>S. epidermidis</i><br>3, <i>S. gallinarum</i> 1, <i>S.</i><br><i>haemolyticus</i> 4, <i>S.</i><br><i>hominis</i> 2, <i>S. hyicus</i> 1, <i>S.</i><br><i>lentus</i> 1, <i>S. lugdunensis</i> 1,<br><i>S. sciuri</i> 1, <i>S. xylosus</i> 1 |  |  |  |  |  |  |  |  |  |
|-----------------------------------------------------------------------------------------------------------------------------------------------------------------------------------------------------------------------------------------------------------------|--|--|--|--|--|--|--|--|--|

410

411

412

413

414

415

416

417

418

419

420

421 **Table. 4. The minimum inhibitory concentration (MIC) doxycycline for different strains of bacteria in presence of**  
 422 **paracetamol.**

| Genus of bacteria tested | Species of bacteria tested and their numbers                                                                   | Minimum concentration of aspirin (mg/ mL) having MIC decreasing effect | Percent decrease in MIC of doxycycline in presence of paracetamol (mg/ mL) |      |      |      |      |      |      |      |
|--------------------------|----------------------------------------------------------------------------------------------------------------|------------------------------------------------------------------------|----------------------------------------------------------------------------|------|------|------|------|------|------|------|
|                          |                                                                                                                |                                                                        | 1.28                                                                       | 0.64 | 0.32 | 0.16 | 0.08 | 0.04 | 0.02 | 0.01 |
| <i>Aeromonas</i>         | <i>A. bestiarum</i> 1, <i>A. eucranophila</i> 2, <i>A. media</i> 2, <i>A. popoffi</i> 2, <i>A. scubertii</i> 2 | 0.02                                                                   | 0.00                                                                       | 0.24 | 0.24 | 0.24 | 0.24 | 0.24 | 0.24 | 0.00 |
| <i>Bacillus</i>          | <i>B. brevis</i> 1, <i>B. cereus</i> 2, <i>B. megaterium</i> 1, <i>B. mycoides</i> 1                           | 0.32                                                                   | 0.75                                                                       | 0.50 | 0.50 | 0.00 | 0.00 | 0.00 | 0.00 | 0.00 |

|                       |                                                                                                   |      |      |      |      |      |      |      |      |      |
|-----------------------|---------------------------------------------------------------------------------------------------|------|------|------|------|------|------|------|------|------|
| <i>Enterobacter</i>   | <i>E. agglomerans</i> 5, <i>E. gregoviae</i> 1                                                    | 0.02 | 0.99 | 0.99 | 0.98 | 0.97 | 0.95 | 0.90 | 0.50 | 0.00 |
| <i>Erwinia</i>        | <i>Erwinia stewartii</i> 1                                                                        | 0.01 | 0.00 | 0.00 | 0.50 | 0.50 | 0.50 | 0.50 | 0.50 | 0.50 |
| <i>Escherichia</i>    | <i>E. coli</i> 25, <i>E. fergusonii</i> 3, <i>E. hermani</i> 1                                    | 0.01 | 0.66 | 0.65 | 0.65 | 0.63 | 0.60 | 0.44 | 0.25 | 0.25 |
| <i>Klebsiella</i>     | <i>Klebsiella pneumoniae</i> ssp. <i>pneumoniae</i> 12                                            | 0.01 | 0.59 | 0.56 | 0.50 | 0.50 | 0.43 | 0.30 | 0.03 | 0.30 |
| <i>Moraxella</i>      | <i>M. bovis</i> 1, <i>M. ovis</i> 1                                                               | NA   | 0.00 | 0.00 | 0.00 | 0.00 | 0.00 | 0.00 | 0.00 | 0.00 |
| <i>Proteus</i>        | <i>P. mirabilis</i> 5, <i>P. penneri</i> 1, <i>P. vulgaris</i> 1                                  | NA   | 0.00 | 0.00 | 0.00 | 0.00 | 0.00 | 0.00 | 0.00 | 0.00 |
| <i>Pseudomonas</i>    | <i>P. aeruginosa</i> 5, <i>P. paucimobilis</i> 1, <i>P. pseudoalcaligenes</i> 1                   | NA   | 0.00 | 0.00 | 0.00 | 0.00 | 0.00 | 0.00 | 0.00 | 0.00 |
| <i>Staphylococcus</i> | <i>S. aureus</i> 4, <i>S. capitis</i> ssp. <i>capitis</i> 1, ssp. <i>urealyticus</i> 1, <i>S.</i> | 0.04 | 0.22 | 0.22 | 0.20 | 0.17 | 0.12 | 0.12 | 0.00 | 0.00 |



|                      |                                                                                                                                                                                                                                                                                                                                      |      |      |      |      |      |      |      |      |      |
|----------------------|--------------------------------------------------------------------------------------------------------------------------------------------------------------------------------------------------------------------------------------------------------------------------------------------------------------------------------------|------|------|------|------|------|------|------|------|------|
|                      | <i>caseolytus</i> 1, <i>S.</i><br><i>chromogenes</i> 1, <i>S.</i><br><i>delphini</i> 4, <i>S. epidermidis</i><br>3, <i>S. gallinarum</i> 1, <i>S.</i><br><i>haemolyticus</i> 4, <i>S.</i><br><i>hominis</i> 2, <i>S. hyicus</i> 1, <i>S.</i><br><i>lentus</i> 1, <i>S. lugdunensis</i> 1,<br><i>S. sciuri</i> 1, <i>S. xylosus</i> 1 |      |      |      |      |      |      |      |      |      |
| <i>Streptococcus</i> | <i>S. milleri</i> 3, <i>S.</i><br><i>pneumoniae</i> 2,<br><i>Spyogenes</i> 1, <i>S. salivaris</i><br>1                                                                                                                                                                                                                               | 0.04 | 0.00 | 0.94 | 0.94 | 0.94 | 0.94 | 0.94 | 0.00 | 0.00 |

423

424

425

426

427

428 **Table 5. Synergistic effect of aspirin and paracetamol with minocycline and doxycycline antibiotic potential in terms of**  
 429 **conversion of resistant bacteria to sensitive to the antibiotics.**

| <b>Concentration of aspirin/paracetamol (mg/ mL) in test medium</b> | <b>Minocycline-resistant bacteria turned sensitive (32)</b>                                                                                          | <b>Minocycline-resistant bacteria not turned sensitive (25)</b>                                       | <b>Doxycycline-resistant bacteria turned sensitive in presence of aspirin (30)</b>                          | <b>Doxycycline-resistant bacteria not turned sensitive in presence of aspirin (19)</b> | <b>Doxycycline-resistant bacteria turned sensitive in presence of paracetamol (11)</b>                                         | <b>Doxycycline-resistant bacteria not turned sensitive in presence of paracetamol (23)</b>               |
|---------------------------------------------------------------------|------------------------------------------------------------------------------------------------------------------------------------------------------|-------------------------------------------------------------------------------------------------------|-------------------------------------------------------------------------------------------------------------|----------------------------------------------------------------------------------------|--------------------------------------------------------------------------------------------------------------------------------|----------------------------------------------------------------------------------------------------------|
| <b>1.28</b>                                                         | <i>Acinetobacter alcalgenes</i> 1, <i>Escherichia coli</i> 11, <i>E. fergusonii</i> 1, <i>E. tarda</i> 1, <i>E. faecium</i> 2, <i>E. faecalis</i> 2, | <i>Burkholderia cepacia</i> 1, <i>Escherichia coli</i> 4, <i>E. fergusonii</i> 1, <i>Enterobacter</i> | <i>Aeromonas schubertii</i> 1, <i>Escherichia coli</i> 4, <i>fergusonii</i> 1, <i>Edwardsiella tarda</i> 1, | <i>Aeromonas popoffii</i> 2, <i>Bacillus cereus</i> 1, <i>Escherichia coli</i>         | <i>Escherichia coli</i> 2, <i>E. fergusonii</i> 1, <i>E. hermannii</i> 1, <i>Enterobacter agglomerans</i> 3, <i>Klebsiella</i> | <i>Aeromonas popoffii</i> 2, <i>A. schubertii</i> 1, <i>Erwinia stewartii</i> 1, <i>Escherichia coli</i> |

|                                                                                                                                                                                                                                                                                                                                                             |                                                                                                                                                                                                                                                                                                        |                                                                                                                                                                                                                                                                                                                                                |                                                                                                                                                                                                                                     |                                                                                 |                                                                                                                                                                                                                                                                 |
|-------------------------------------------------------------------------------------------------------------------------------------------------------------------------------------------------------------------------------------------------------------------------------------------------------------------------------------------------------------|--------------------------------------------------------------------------------------------------------------------------------------------------------------------------------------------------------------------------------------------------------------------------------------------------------|------------------------------------------------------------------------------------------------------------------------------------------------------------------------------------------------------------------------------------------------------------------------------------------------------------------------------------------------|-------------------------------------------------------------------------------------------------------------------------------------------------------------------------------------------------------------------------------------|---------------------------------------------------------------------------------|-----------------------------------------------------------------------------------------------------------------------------------------------------------------------------------------------------------------------------------------------------------------|
| <i>Enterobacter agglomerans</i> 1, <i>E. grigoviae</i> 1, <i>Klebsiella pneumoniae</i> ssp. <i>pneumoniae</i> 3, <i>Flexibacter</i> spp. 1, <i>Pseudomonas paucimobilis</i> 1, <i>Raoultella terrigena</i> 1, <i>Salmonella enterica</i> ssp. <i>enterica</i> 2, <i>Staphylococcus epidermidis</i> 1, <i>Streptococcus milleri</i> 2, <i>S. salivaris</i> 1 | <i>agglomerans</i> 1, <i>Hafnia alvei</i> 4, <i>Klebsiella pneumoniae pneumoniae</i> ssp. <i>pneumoniae</i> 1, <i>Proteus mirabilis</i> 3, <i>P. vulgaris</i> 1, <i>Pseudomonas aeruginosa</i> 5, <i>Raoultella terrigena</i> 2, <i>Salmonella enterica</i> ssp. <i>enterica</i> 1, <i>enterica</i> 1, | <i>Enterobacter agglomerans</i> 3, <i>Enterococcus faecium</i> 4, <i>E. solitarius</i> 2, <i>Erwinia stewartii</i> 1, <i>Klebsiella pneumoniae</i> ssp. <i>pneumoniae</i> 3, <i>Moraxella ovis</i> 1, <i>Proteus mirabilis</i> 1, <i>Pseudomonas pseudoalcaligenes</i> 1, <i>Staphylococcus chromogenes</i> 1, <i>S. delphini</i> 1, <i>S.</i> | 5, <i>Edwardsiella tarda</i> 1, <i>Hafnia alvei</i> 2, <i>Klebsiella pneumoniae</i> ssp. <i>pneumoniae</i> 2, <i>Proteus mirabilis</i> 2, <i>Raoultella terrigena</i> 1, <i>Staphylococcus haemolyticus</i> 1, <i>Streptococcus</i> | <i>pneumoniae</i> ssp. <i>pneumoniae</i> 2, <i>Staphylococcus epidermidis</i> 1 | 2, <i>Hafnia alvei</i> 2, <i>Klebsiella pneumoniae</i> ssp. <i>pneumoniae</i> 6, <i>Moraxella ovis</i> 1, <i>Proteus mirabilis</i> 3, <i>Pseudomonas pseudoalcaligenes</i> 1, <i>Staphylococcus chromogenes</i> 1, <i>S. haemolyticus</i> 2, <i>S. lentus</i> 1 |
|-------------------------------------------------------------------------------------------------------------------------------------------------------------------------------------------------------------------------------------------------------------------------------------------------------------------------------------------------------------|--------------------------------------------------------------------------------------------------------------------------------------------------------------------------------------------------------------------------------------------------------------------------------------------------------|------------------------------------------------------------------------------------------------------------------------------------------------------------------------------------------------------------------------------------------------------------------------------------------------------------------------------------------------|-------------------------------------------------------------------------------------------------------------------------------------------------------------------------------------------------------------------------------------|---------------------------------------------------------------------------------|-----------------------------------------------------------------------------------------------------------------------------------------------------------------------------------------------------------------------------------------------------------------|

|             |                                                                                                                                                                                                                                                               |                                 |                                                                                                                                                                                                                       |                     |                                                                                                                                                                                                                              |  |
|-------------|---------------------------------------------------------------------------------------------------------------------------------------------------------------------------------------------------------------------------------------------------------------|---------------------------------|-----------------------------------------------------------------------------------------------------------------------------------------------------------------------------------------------------------------------|---------------------|------------------------------------------------------------------------------------------------------------------------------------------------------------------------------------------------------------------------------|--|
|             |                                                                                                                                                                                                                                                               | <i>Staphylococcus hominis</i> 1 | <i>epidermidis</i> 1, <i>S. gallinarum</i> 1, <i>S. lentus</i> 1, <i>Streptococcus pneumoniae</i> 2                                                                                                                   | <i>s. milleri</i> 2 |                                                                                                                                                                                                                              |  |
| <b>0.64</b> | <i>Acinetobacter alcaligenes</i> 1, <i>Escherichia coli</i> 11, <i>E. fergusonii</i> 1, <i>E. tarda</i> 1, <i>E. faecium</i> 2, <i>E. faecalis</i> 2, <i>Enterobacter agglomerans</i> 1, <i>E. grigoviae</i> 1, <i>Flexibacter</i> spp. 1, <i>Pseudomonas</i> |                                 | <i>Escherichia coli</i> 3, <i>fergusonii</i> 1, <i>Edwardsiella tarda</i> 1, <i>Enterobacter agglomerans</i> 3, <i>Enterococcus faecium</i> 4, <i>E. solitarius</i> 2, <i>Moraxella ovis</i> 1, <i>Staphylococcus</i> |                     | <i>Escherichia coli</i> 2, <i>E. fergusonii</i> 1, <i>E. hermanii</i> 1, <i>Enterobacter agglomerans</i> 3, <i>Klebsiella pneumoniae</i> ssp. <i>pneumoniae</i> 2, <i>Staphylococcus epidermidis</i> 1, <i>Streptococcus</i> |  |

|             |                                                                                                                                                                                                                                                                                                                                   |
|-------------|-----------------------------------------------------------------------------------------------------------------------------------------------------------------------------------------------------------------------------------------------------------------------------------------------------------------------------------|
|             | <p><i>paucimobilis</i> 1,<br/> <i>Raoultella terrigena</i> 1,<br/> <i>Salmonella enterica</i><br/> ssp. <i>enterica</i> 2, <i>S.</i><br/> <i>milleri</i> 2, <i>S. salivaris</i> 1</p>                                                                                                                                             |
| <b>0.32</b> | <p><i>Acinetobacter</i><br/> <i>alcaligenes</i> 1,<br/> <i>Escherichia coli</i> 10, <i>E.</i><br/> <i>fergusonii</i> 1, <i>E. tarda</i><br/> 1, <i>E. faecium</i> 2, <i>E.</i><br/> <i>faecalis</i> 2,<br/> <i>Enterobacter</i><br/> <i>agglomerans</i> 1. <i>E.</i><br/> <i>grigoviae</i> 1,<br/> <i>Flexibacter</i> spp. 1,</p> |

|                                                                                                                                                                                                                                                                              |
|------------------------------------------------------------------------------------------------------------------------------------------------------------------------------------------------------------------------------------------------------------------------------|
| <p><i>chromogenes</i> 1, <i>S.</i><br/> <i>delphini</i> 1, <i>S.</i><br/> <i>epidermidis</i> 1, <i>S.</i><br/> <i>Gallinarum</i> 1,<br/> <i>Streptococcus</i><br/> <i>pneumoniae</i> 3</p>                                                                                   |
| <p><i>Escherichia coli</i><br/> 3, <i>fergusonii</i> 1,<br/> <i>Edwardsiella</i><br/> <i>tarda</i> 1,<br/> <i>Enterobacter</i><br/> <i>agglomerans</i> 2,<br/> <i>Enterococcus</i><br/> <i>faecium</i> 4, <i>E.</i><br/> <i>solitarius</i> 2,<br/> <i>Staphylococcus</i></p> |

|                                                                                                                                                                                                                                                                                         |
|-----------------------------------------------------------------------------------------------------------------------------------------------------------------------------------------------------------------------------------------------------------------------------------------|
| <p><i>salivaris</i> 2</p>                                                                                                                                                                                                                                                               |
| <p><i>Escherichia coli</i> 2,<br/> <i>E. fergusonii</i> 1, <i>E.</i><br/> <i>hermanii</i> 1,<br/> <i>Enterobacter</i><br/> <i>agglomerans</i> 3,<br/> <i>Klebsiella</i><br/> <i>pneumoniae</i> ssp.<br/> <i>pneumoniae</i> 2,<br/> <i>Staphylococcus</i><br/> <i>epidermidis</i> 1,</p> |

|      |                                                                                                                                                                                                                                                         |                                                                                                                                                                                                                                |                                                                                                                                                                                                                    |
|------|---------------------------------------------------------------------------------------------------------------------------------------------------------------------------------------------------------------------------------------------------------|--------------------------------------------------------------------------------------------------------------------------------------------------------------------------------------------------------------------------------|--------------------------------------------------------------------------------------------------------------------------------------------------------------------------------------------------------------------|
|      | <p><i>Raoultella terrigena</i> 1,<br/><i>S. milleri</i> 3</p>                                                                                                                                                                                           | <p><i>delphini</i> 1, s.<br/><i>epidermidis</i> 1, S.<br/><i>Gallinarum</i> 1,<br/><i>Streptococcus pneumoniae</i> 3</p>                                                                                                       | <p><i>Streptococcus salivaris</i> 2</p>                                                                                                                                                                            |
| 0.16 | <p><i>Acinetobacter alcaligenes</i> 1,<br/><i>Escherichia coli</i> 9, <i>E. fergusonii</i> 1, <i>E. tarda</i> 1, <i>E. faecium</i> 2, <i>E. faecalis</i> 2,<br/><i>Enterobacter grigoviae</i> 1,<br/><i>Flexibacter</i> spp. 1, <i>S. milleri</i> 3</p> | <p><i>Escherichia coli</i> 3, <i>fergusonii</i> 1, <i>Edwardsiella tarda</i> 1,<br/><i>Enterobacter agglomerans</i> 2,<br/><i>Enterococcus faecium</i> 4, <i>E. solitarius</i> 2,<br/><i>Staphylococcus delphini</i> 1, s.</p> | <p><i>Escherichia coli</i> 2, <i>E. fergusonii</i> 1, <i>E. hermanii</i> 1,<br/><i>Enterobacter agglomerans</i> 3,<br/><i>Klebsiella pneumoniae</i> ssp. <i>pneumoniae</i> 2, <i>Streptococcus salivaris</i> 2</p> |

|             |                                                                                                                                                                                                                                                                                                    |                                                                                                                                                                                                                                                                                                   |                                                                                                                                                                                     |
|-------------|----------------------------------------------------------------------------------------------------------------------------------------------------------------------------------------------------------------------------------------------------------------------------------------------------|---------------------------------------------------------------------------------------------------------------------------------------------------------------------------------------------------------------------------------------------------------------------------------------------------|-------------------------------------------------------------------------------------------------------------------------------------------------------------------------------------|
|             |                                                                                                                                                                                                                                                                                                    | <i>epidermidis</i> 1, <i>S.</i><br><i>Gallinarum</i> 1,<br><i>Streptococcus</i><br><i>pneumoniae</i> 3                                                                                                                                                                                            |                                                                                                                                                                                     |
| <b>0.08</b> | <i>Acinetobacter</i><br><i>alcaligenes</i> 1,<br><i>Escherichia coli</i> 9, <i>E.</i><br><i>fergusonii</i> 1, <i>E. tarda</i><br>1, <i>E. faecium</i> 2, <i>E.</i><br><i>faecalis</i> 2,<br><i>Enterobacter</i><br><i>grigoviae</i> 1,<br><i>Flexibacter</i> spp. 1, <i>S.</i><br><i>milleri</i> 3 | <i>Escherichia coli</i><br>3, <i>fergusonii</i> 1,<br><i>Edwardsiella</i><br><i>tarda</i> 1,<br><i>Enterobacter</i><br><i>agglomerans</i> 1,<br><i>Enterococcus</i><br><i>faecium</i> 4, <i>E.</i><br><i>solitarius</i> 2,<br><i>Staphylococcus</i><br><i>delphini</i> 1,<br><i>Streptococcus</i> | <i>Escherichia coli</i> 2,<br><i>E. fergusonii</i> 1, <i>E.</i><br><i>hermanii</i> 1,<br><i>Enterobacter</i><br><i>agglomerans</i> 1,<br><i>Streptococcus</i><br><i>salivaris</i> 2 |

|             |                                                                                                                                            |  |                                                                                   |  |                                  |
|-------------|--------------------------------------------------------------------------------------------------------------------------------------------|--|-----------------------------------------------------------------------------------|--|----------------------------------|
|             |                                                                                                                                            |  | <i>pneumoniae</i> 3                                                               |  |                                  |
| <b>0.04</b> | <i>Escherichia coli</i> 4, <i>E. fergusonii</i> 1, <i>E. tarda</i> 1, <i>E. faecium</i> 2, <i>E. faecalis</i> 2, <i>Flexibacter</i> spp. 2 |  | <i>Escherichia coli</i> 1, <i>fergusonii</i> 1, <i>Enterobacter agglomerans</i> 1 |  | <i>Streptococcus salivaris</i> 2 |
| <b>0.02</b> | <i>Escherichia coli</i> 4, <i>E. fergusonii</i> 1, <i>E. tarda</i> 1, <i>E. faecium</i> 2, <i>E. faecalis</i> 3                            |  | <i>Escherichia fergusonii</i> 1                                                   |  | -                                |
| <b>0.01</b> | <i>Escherichia coli</i>                                                                                                                    |  | -                                                                                 |  | -                                |



430

431

432

433
